# Supplementary material for: 9222 肥薩線開通による貨物輸送と都市の発展に関する研究(都市史:日本(4),2013年度日本建築学会大会(北海道)学術講演会・建築デザイン発表会)
Source: Royal Society of Chemistry journal article supplement (doi:10.1039/b514104d), 2013-08-30

**Supplementary information:**

**Theoretical investigation of paramagnetic group 13 diazabutadiene radicals: Insights into the prediction and interpretation of EPR spectroscopy parameters**

**Heikki M. Tuononen<sup>\*a</sup> and Andrea F. Armstrong<sup>b</sup>**

<sup>a</sup> Department of Chemistry, University of Jyväskylä

P.O. Box 35, FIN-40014 Jyväskylä, Finland

E-mail: [hetuonon@cc.jyu.fi](mailto:hetuonon@cc.jyu.fi)

Tel: +358-14-260-2613

Fax: +358-14-260-2501

<sup>b</sup> Department of Chemistry, McMaster University

1280 Main St. W., Hamilton, Ontario, Canada L8S 4M

**Table S1** Calculated hyperfine coupling constants of monocyclic group 13 diazabutadiene radicals **6-M<sup>R</sup>X<sup>a</sup>**

| (R-DAB)MX <sub>2</sub> <sup>•</sup> | R               | M     | <sup>14</sup> N | <sup>1</sup> H | X    |
|-------------------------------------|-----------------|-------|-----------------|----------------|------|
| M = <sup>27</sup> Al                | H               | -6.9  | 2.9             | -7.1           | 8.3  |
| X = <sup>19</sup> F                 | Me              | -7.5  | 3.7             | -6.2           | 8.8  |
|                                     | <sup>t</sup> Bu | -7.4  | 3.7             | -6.3           | 9.7  |
|                                     | Ph              | -7.1  | 3.6             | -6.7           | 8.3  |
| M = <sup>27</sup> Al                | H               | -7.4  | 3.0             | -7.1           | 1.5  |
| X = <sup>35</sup> Cl                | Me              | -8.1  | 3.7             | -6.2           | 1.5  |
|                                     | <sup>t</sup> Bu | -8.2  | 3.8             | -6.2           | 1.6  |
|                                     | Ph              | -7.7  | 3.6             | -6.7           | 1.4  |
| M = <sup>27</sup> Al                | H               | -7.6  | 3.0             | -7.0           | 5.7  |
| X = <sup>79</sup> Br                | Me              | -8.2  | 3.8             | -6.2           | 6.2  |
|                                     | <sup>t</sup> Bu | -8.4  | 3.8             | -6.2           | 7.1  |
|                                     | Ph              | -7.8  | 2.7             | -6.7           | 5.5  |
| M = <sup>27</sup> Al                | H               | -8.2  | 3.0             | -6.9           | 6.3  |
| X = <sup>127</sup> I                | Me              | -8.7  | 3.8             | -6.1           | 7.3  |
|                                     | <sup>t</sup> Bu | -8.9  | 3.9             | -6.1           | 10.0 |
|                                     | Ph              | -8.4  | 3.7             | -6.6           | 6.8  |
| M = <sup>69</sup> Ga                | H               | -23.2 | 3.4             | -7.0           | 8.0  |
| X = <sup>19</sup> F                 | Me              | -25.4 | 4.2             | -6.0           | 8.6  |
|                                     | <sup>t</sup> Bu | -25.2 | 4.2             | -6.1           | 9.7  |
|                                     | Ph              | -24.1 | 4.1             | -6.6           | 8.0  |
| M = <sup>69</sup> Ga                | H               | -22.8 | 3.5             | -6.8           | 1.5  |
| X = <sup>35</sup> Cl                | Me              | -24.9 | 4.3             | -5.9           | 1.5  |
|                                     | <sup>t</sup> Bu | -25.2 | 4.4             | -6.0           | 1.7  |
|                                     | Ph              | -23.6 | 4.2             | -6.5           | 1.4  |

**Table S1** Continued

| (R-DAB)MX <sub>2</sub> <sup>•</sup> | R               | M     | <sup>14</sup> N | <sup>1</sup> H | X    |
|-------------------------------------|-----------------|-------|-----------------|----------------|------|
| M = <sup>69</sup> Ga                | H               | -22.9 | 3.6             | -6.8           | 6.0  |
| X = <sup>79</sup> Br                | Me              | -25.0 | 4.3             | -5.9           | 6.5  |
|                                     | <sup>t</sup> Bu | -25.3 | 4.5             | -5.9           | 7.5  |
|                                     | Ph              | -23.6 | 4.3             | -6.4           | 5.8  |
| M = <sup>69</sup> Ga                | H               | -23.9 | 3.6             | -6.7           | 8.3  |
| X = <sup>127</sup> I                | Me              | -25.5 | 4.4             | -5.8           | 9.1  |
|                                     | <sup>t</sup> Bu | -25.8 | 4.5             | -5.8           | 11.9 |
|                                     | Ph              | -24.2 | 4.3             | -6.3           | 8.9  |
| M = <sup>115</sup> In               | H               | -35.7 | 3.7             | -6.6           | 5.2  |
| X = <sup>19</sup> F                 | Me              | -39.6 | 4.6             | -5.7           | 5.3  |
|                                     | <sup>t</sup> Bu | -39.2 | 4.5             | -5.8           | 6.1  |
|                                     | Ph              | -37.3 | 4.5             | -6.2           | 4.9  |
| M = <sup>115</sup> In               | H               | -32.1 | 3.8             | -6.6           | 1.0  |
| X = <sup>35</sup> Cl                | Me              | -35.8 | 4.7             | -5.6           | 1.0  |
|                                     | <sup>t</sup> Bu | -36.5 | 4.6             | -5.7           | 1.1  |
|                                     | Ph              | -33.7 | 4.6             | -6.2           | 1.0  |
| M = <sup>115</sup> In               | H               | -30.6 | 3.8             | -6.6           | 4.5  |
| X = <sup>79</sup> Br                | Me              | -33.9 | 4.7             | -5.6           | 4.6  |
|                                     | <sup>t</sup> Bu | -34.7 | 4.7             | -5.7           | 5.1  |
|                                     | Ph              | -31.6 | 4.6             | -6.2           | 4.1  |
| M = <sup>115</sup> In               | H               | -29.0 | 3.9             | -6.5           | 6.6  |
| X = <sup>127</sup> I                | Me              | -31.8 | 4.7             | -5.3           | 7.2  |
|                                     | <sup>t</sup> Bu | -32.8 | 4.7             | -5.7           | 8.9  |
|                                     | Ph              | -29.8 | 4.6             | -6.1           | 7.0  |

<sup>a</sup> Values reported in Gauss (1G = 0.1mT).

**Table S2** Calculated hyperfine coupling constants of dimeric group 13 diazabutadiene diradicals **7-M<sup>R</sup><sub>X</sub><sup>a</sup>**

| [(R-DAB)MX] <sub>2</sub> <sup>••</sup> | R                     | M    | <sup>14</sup> N | <sup>1</sup> H | X    |
|----------------------------------------|-----------------------|------|-----------------|----------------|------|
| M = <sup>27</sup> Al                   | H                     | 5.5  | 1.6 / 1.9       | -3.8 / -3.9    | 14.0 |
| X = <sup>19</sup> F                    | Me                    | 2.8  | 2.0 / 2.3       | -3.1 / -2.7    | 13.2 |
|                                        | <sup>t</sup> Bu       | 5.3  | 2.1 / 2.3       | -3.0 / -2.7    | 14.4 |
|                                        | Ph                    | 4.3  | 1.8 / 2.1       | -2.4 / -2.6    | 9.2  |
|                                        | Ph (C <sub>2h</sub> ) | 0.7  | 1.9             | -2.9           | 10.0 |
| M = <sup>27</sup> Al                   | H                     | 5.9  | 1.6 / 1.9       | -3.8 / -3.9    | 2.1  |
| X = <sup>35</sup> Cl                   | Me                    | 3.5  | 2.0 / 2.3       | -3.1 / -2.7    | 1.9  |
|                                        | <sup>t</sup> Bu       | 5.1  | 2.2 / 2.3       | -3.0 / -2.7    | 2.1  |
|                                        | Ph                    | 4.5  | 1.9 / 2.0       | -2.4 / -2.5    | 1.3  |
|                                        | Ph (C <sub>2h</sub> ) | 1.3  | 1.9             | -2.9           | 1.4  |
| M = <sup>27</sup> Al                   | H                     | 6.1  | 1.5 / 1.9       | -3.8 / -3.9    | 9.2  |
| X = <sup>79</sup> Br                   | Me                    | 3.9  | 2.0 / 2.3       | -3.1 / -2.7    | 8.9  |
|                                        | <sup>t</sup> Bu       | 5.2  | 2.2 / 2.3       | -3.0 / -2.7    | 9.3  |
|                                        | Ph                    | 4.7  | 1.89 / 2.0      | -2.4 / -2.5    | 5.1  |
|                                        | Ph (C <sub>2h</sub> ) | 1.7  | 1.9             | -2.9           | 5.9  |
| M = <sup>27</sup> Al                   | H                     | 6.3  | 1.6 / 1.9       | -3.8 / -3.9    | 11.5 |
| X = <sup>127</sup> I                   | Me                    | 4.1  | 2.0 / 2.3       | -3.1 / -2.7    | 11.3 |
|                                        | <sup>t</sup> Bu       | 5.3  | 2.1 / 2.3       | -3.0 / -2.7    | 13.2 |
|                                        | Ph                    | 4.2  | 1.8 / 2.0       | -2.3 / -2.5    | 5.1  |
|                                        | Ph (C <sub>2h</sub> ) | 1.8  | 1.9             | -2.9           | 6.7  |
| M = <sup>69</sup> Ga                   | H                     | 7.3  | 1.8 / 2.0       | -3.9 / -4.0    | 12.6 |
| X = <sup>19</sup> F                    | Me                    | 4.0  | 2.3 / 2.5       | -3.1 / -2.6    | 12.4 |
|                                        | <sup>t</sup> Bu       | 8.1  | 2.3 / 2.5       | -3.0 / -2.7    | 13.4 |
|                                        | Ph                    | 4.3  | 1.8 / 2.1       | -2.4 / -2.6    | 9.1  |
|                                        | Ph (C <sub>2h</sub> ) | -1.0 | 2.1             | -2.9           | 9.5  |
| M = <sup>69</sup> Ga                   | H                     | 10.6 | 1.9 / 2.1       | -3.9 / -4.0    | 2.0  |
| X = <sup>35</sup> Cl                   | Me                    | 7.1  | 2.3 / 2.6       | -3.0 / -2.6    | 1.9  |
|                                        | <sup>t</sup> Bu       | 10.3 | 2.4 / 2.5       | -3.0 / -2.6    | 2.0  |
|                                        | Ph                    | 6.0  | 1.9 / 2.2       | -2.3 / -2.6    | 1.2  |
|                                        | Ph (C <sub>2h</sub> ) | 1.7  | 2.1             | -2.8           | 1.4  |

**Table S2** Continued

| [(R-DAB)MX] <sub>2</sub> <sup>••</sup> | R                     | M    | <sup>14</sup> N | <sup>1</sup> H | X    |
|----------------------------------------|-----------------------|------|-----------------|----------------|------|
| M = <sup>69</sup> Ga                   | H                     | 11.6 | 1.9 / 2.1       | -3.9 / -4.1    | 8.3  |
| X = <sup>79</sup> Br                   | Me                    | 8.3  | 2.4 / 2.6       | -3.0 / -2.6    | 8.2  |
|                                        | <sup>t</sup> Bu       | 10.9 | 2.4 / 2.5       | -2.9 / -2.6    | 8.8  |
|                                        | Ph                    | 6.3  | 1.9 / 2.1       | -2.3 / -2.4    | 4.1  |
|                                        | Ph (C <sub>2h</sub> ) | 2.9  | 2.2             | -2.8           | 5.6  |
| M = <sup>69</sup> Ga                   | H                     | 12.7 | 1.9 / 2.1       | -3.9 / -4.0    | 10.4 |
| X = <sup>127</sup> I                   | Me                    | 9.5  | 2.3 / 2.6       | -3.0 / -2.6    | 10.3 |
|                                        | <sup>t</sup> Bu       | 11.2 | 2.4 / 2.5       | -3.0 / -2.6    | 12.5 |
|                                        | Ph                    | 10.8 | 1.9 / 2.2       | -2.3 / -2.6    | 4.6  |
|                                        | Ph (C <sub>2h</sub> ) | 3.6  | 2.1             | -2.8           | 6.6  |
| M = <sup>115</sup> In                  | H                     | 7.4  | 1.9 / 2.0       | -3.9 / -4.0    | 8.1  |
| X = <sup>19</sup> F                    | Me                    | 2.3  | 2.4 / 2.6       | -2.6 / -2.9    | 7.6  |
|                                        | <sup>t</sup> Bu       | 16.9 | 2.3 / 2.5       | -2.6 / -2.9    | 10.7 |
|                                        | Ph                    | 6.5  | 2.0 / 2.2       | -2.2 / -2.7    | 5.1  |
|                                        | Ph (C <sub>2h</sub> ) | 4.3  | 2.2             | -2.6           | 5.7  |
| M = <sup>115</sup> In                  | H                     | 13.2 | 1.9 / 2.1       | -3.9 / -4.0    | 1.4  |
| X = <sup>35</sup> Cl                   | Me                    | 7.6  | 2.5 / 2.6       | -2.6 / -2.9    | 1.3  |
|                                        | <sup>t</sup> Bu       | 11.9 | 2.4 / 2.5       | -2.6 / -2.9    | 1.5  |
|                                        | Ph                    | 10.6 | 2.1 / 2.3       | -2.2 / -2.6    | 0.8  |
|                                        | Ph (C <sub>2h</sub> ) | 4.3  | 2.2             | -2.6           | 0.9  |
| M = <sup>115</sup> In                  | H                     | 14.7 | 2.0 / 2.1       | -3.9 / -4.0    | 5.6  |
| X = <sup>79</sup> Br                   | Me                    | 9.4  | 2.5 / 2.6       | -2.6 / -2.9    | 5.3  |
|                                        | <sup>t</sup> Bu       | 18.8 | 2.1 / 2.3       | -2.7 / -2.9    | 6.7  |
|                                        | Ph                    | 12.5 | 2.3             | -2.2 / -2.6    | 3.3  |
|                                        | Ph (C <sub>2h</sub> ) | 5.7  | 2.0 / 2.1       | -2.6           | 3.6  |
| M = <sup>115</sup> In                  | H                     | 17.8 | 2.0 / 2.1       | -3.9 / -4.0    | 7.8  |
| X = <sup>127</sup> I                   | Me                    | 12.1 | 2.5 / 2.6       | -2.6 / -2.9    | 7.8  |
|                                        | <sup>t</sup> Bu       | 20.1 | 2.4 / 2.5       | -2.7 / -2.8    | 9.8  |
|                                        | Ph                    | 15.9 | 2.2 / 2.3       | -2.3 / -2.4    | 3.9  |
|                                        | Ph (C <sub>2h</sub> ) | 8.5  | 2.3             | -2.6           | 4.5  |

<sup>a</sup> Values reported in Gauss (1G = 0.1mT).

**Table S3** Calculated and experimental geometrical parameters of monocyclic group 13 diazabutadiene complexes **6-M<sup>R</sup><sub>X</sub>**<sup>a</sup>

| Parameter    | Al <sup>Ph</sup> <sub>I</sub><br>Calc. | Al <sup>Dipp</sup> <sub>I</sub><br>Exptl. <sup>b</sup> | Ga <sup>tBu</sup> <sub>I</sub><br>Calc. | Ga <sup>tBu</sup> <sub>I</sub><br>Exptl. <sup>b</sup> | Ga <sup>Ph</sup> <sub>I</sub><br>Calc. | Ga <sup>Dipp</sup> <sub>I</sub><br>Exptl. <sup>c</sup> | In <sup>Ph</sup> <sub>Cl</sub><br>Calc. | In <sup>Dipp</sup> <sub>Cl</sub><br>Exptl. <sup>d</sup> |
|--------------|----------------------------------------|--------------------------------------------------------|-----------------------------------------|-------------------------------------------------------|----------------------------------------|--------------------------------------------------------|-----------------------------------------|---------------------------------------------------------|
| r MN         | 1.918                                  | 1.889                                                  | 1.965                                   | 1.931                                                 | 1.971                                  | 1.945                                                  | 2.164                                   | 2.193                                                   |
| r NC(1)      | 1.332                                  | 1.337                                                  | 1.328                                   | 1.337                                                 | 1.329                                  | 1.339                                                  | 1.328                                   | 1.331                                                   |
| r NC(2)      | 1.421                                  | 1.445                                                  | 1.475                                   | 1.488                                                 | 1.418                                  | 1.437                                                  | 1.418                                   | 1.439                                                   |
| r C(1)C(1*)  | 1.399                                  | 1.409                                                  | 1.398                                   | 1.450                                                 | 1.399                                  | 1.404                                                  | 1.402                                   | 1.384                                                   |
| r MX         | 2.507                                  | 2.514                                                  | 2.537                                   | 2.531                                                 | 2.517                                  | 2.519                                                  | 2.337                                   | 236.4                                                   |
| ∠ XMX*       | 116.2                                  | 110.8                                                  | 115.1                                   | 109.3                                                 | 117.1                                  | 112.3                                                  | 117.5                                   | 111.5                                                   |
| ∠ XMN        | 112.8                                  | 114.2                                                  | 113.1                                   | 114.8                                                 | 112.8                                  | 114.0                                                  | 113.7                                   | 112.3                                                   |
| ∠ MNC(1)     | 110.2                                  | 108.9                                                  | 108.3                                   | 109.6                                                 | 110.2                                  | 109.1                                                  | 110.5                                   | 110.9                                                   |
| ∠ NMN        | 85.7                                   | 87.4                                                   | 85.8                                    | 87.1                                                  | 84.0                                   | 85.7                                                   | 78.5                                    | 77.0                                                    |
| ∠ MNC(2)     | 129.5                                  | 130.5                                                  | 130.9                                   | 129.6                                                 | 128.6                                  | 129.2                                                  | 129.0                                   | 128.6                                                   |
| ∠ NC(1)C(1*) | 116.9                                  | 116.7                                                  | 118.8                                   | 116.9                                                 | 117.8                                  | 117.6                                                  | 120.2                                   | 119.8                                                   |

<sup>a</sup> Average values of experimental parameters are reported. <sup>b</sup> Reference 11e. <sup>c</sup> Reference 11d. <sup>d</sup> Reference 11h.

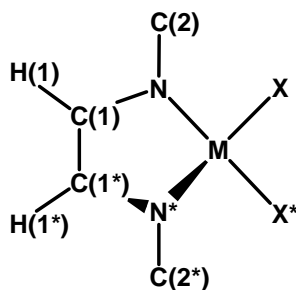

**Table S4** Calculated and experimental geometrical parameters of dimeric group 13 diazabutadiene diradicals  $7\text{-M}^{\text{R}}_{\text{I}}$ <sup>a</sup>

| Parameter      | $\text{Ga}^{\text{tBu}}_{\text{I}}$<br>Calc. | $\text{Ga}^{\text{tBu}}_{\text{I}}$<br>Exptl. <sup>b</sup> | $\text{Ga}^{\text{Ph}}_{\text{Br}}$<br>Calc. | $\text{Ga}^{\text{Dipp}}_{\text{Br}}$<br>Exptl. <sup>c</sup> | $\text{Ga}^{\text{Ph}}_{\text{I}}$<br>Calc. | $\text{Ga}^{\text{Dipp}}_{\text{I}}$<br>Exptl. <sup>c</sup> | $\text{In}^{\text{Dipp}}_{\text{Cl}}$<br>Calc. | $\text{In}^{\text{Dipp}}_{\text{Cl}}$<br>Exptl. <sup>d</sup> |
|----------------|----------------------------------------------|------------------------------------------------------------|----------------------------------------------|--------------------------------------------------------------|---------------------------------------------|-------------------------------------------------------------|------------------------------------------------|--------------------------------------------------------------|
| r MM*          | 2.433                                        | 2.423                                                      | 2.454                                        | 2.466                                                        | 2.462                                       | 2.576                                                       | 2.742                                          | 2.727                                                        |
| r MX           | 2.618                                        | 2.617                                                      | 2.377                                        | 2.374                                                        | 2.586                                       | 2.586                                                       | 2.387                                          | 2.409                                                        |
| r MN(1)        | 1.986                                        | 1.968                                                      | 1.999                                        | 1.982                                                        | 2.000                                       | 1.997                                                       | 2.198                                          | 2.168                                                        |
| r MN(2)        | 1.997                                        | 1.966                                                      | -                                            | -                                                            | -                                           | -                                                           | -                                              | -                                                            |
| r N(1)C(1)     | 1.327                                        | 1.334                                                      | 1.331                                        | 1.343                                                        | 1.332                                       | 1.336                                                       | 1.330                                          | 1.324                                                        |
| r N(2)C(2)     | 1.328                                        | 1.322                                                      | -                                            | -                                                            | -                                           | -                                                           | -                                              | -                                                            |
| r C(1)C(2)     | 1.397                                        | 1.395                                                      | 1.392                                        | 1.385                                                        | 1.391                                       | 1.411                                                       | 1.394                                          | 1.410                                                        |
| r N(1)C(3)     | 1.475                                        | 1.483                                                      | 1.405                                        | 1.434                                                        | 1.405                                       | 1.445                                                       | 1.399                                          | 1.444                                                        |
| r N(2)C(4)     | 1.472                                        | 1.484                                                      | -                                            | -                                                            | -                                           | -                                                           | -                                              | -                                                            |
| ∠ XMM*         | 119.4                                        | 115.2                                                      | 112.5                                        | 113.2                                                        | 112.3                                       | 113.8                                                       | 114.9                                          | 118.8                                                        |
| ∠ N(1)MN(2)    | 84.2                                         | 85.2                                                       | 82.7                                         | 83.9                                                         | 82.8                                        | 84.0                                                        | 77.4                                           | 78.7                                                         |
| ∠ N(1)MM       | 97.2                                         | 116.3                                                      | 124.0                                        | 123.2                                                        | 123.8                                       | 121.8                                                       | 125.2                                          | 122.2                                                        |
| ∠ N(2)MM       | 128.8                                        | 124.8                                                      | -                                            | -                                                            | -                                           | -                                                           | -                                              | -                                                            |
| ∠ C(1)N(1)M    | 115.4                                        | 109.0                                                      | 109.6                                        | 134.2                                                        | 109.6                                       | 109.9                                                       | 110.1                                          | 110.2                                                        |
| ∠ C(2)N(2)M    | 109.2                                        | 108.8                                                      | -                                            | -                                                            | -                                           | -                                                           | -                                              | -                                                            |
| ∠ C(1)C(2)N(2) | 118.5                                        | 118.7                                                      | 118.1                                        | 118.1                                                        | 118.8                                       | 117.4                                                       | 120.6                                          | 120.4                                                        |
| ∠ C(2)C(1)N(1) | 118.8                                        | 118.0                                                      | -                                            | -                                                            | -                                           | -                                                           | -                                              | -                                                            |
| ∠ MN(1)C(3)    | 130.0                                        | 131.2                                                      | 129.7                                        | 131.0                                                        | 129.8                                       | 131.8                                                       | 128.4                                          | 130.2                                                        |
| ∠ MN(2)C(4)    | 127.7                                        | 131.1                                                      | -                                            | -                                                            | -                                           | -                                                           | -                                              | -                                                            |
| d XMM*X*       | 81.7                                         | 72.8                                                       | 180.0                                        | 180.0                                                        | 180.0                                       | 180.0                                                       | 180.0                                          | 180.0                                                        |

<sup>a</sup> Average values of experimental parameters are reported. <sup>b</sup> Reference 11e. <sup>c</sup> Reference 11d. <sup>d</sup> Reference 11f.

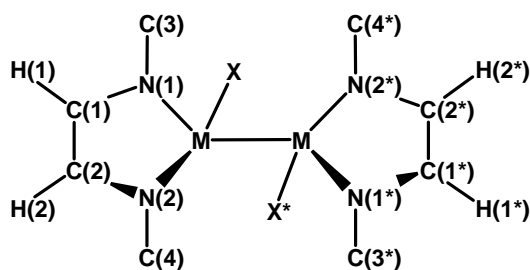

Supplement: b514104d.pdf [file b514104d.pdf]
